# Supplementary material for: Functionally non-redundant paralogs spe-47 and spe-50 encode FB-MO associated proteins and interact with him-8
Source: PubMed Central journal article supplement (PMC7774929; doi:10.1371/journal.pone.0230939), 2020-12-31
Supplement: pone.0230939.s002.pdf [file pone.0230939.s002.pdf]

**Fertility Data**

Data from Figure 4: All worms maintained at 25C from L4 stage onward

|      | spe-27(it132) | spe-47(hc198) | spe-47(hc198);<br>spe-27(it132) | spe-50(zq26) | spe-50(zq26);<br>spe-27(it132) | spe-47(hc198);<br>spe-50(zq26) | N2    |
|------|---------------|---------------|---------------------------------|--------------|--------------------------------|--------------------------------|-------|
|      | 0             | 58            | 1                               | 258          | 0                              | 45                             | 132   |
|      | 0             | 52            | 8                               | 221          | 0                              | 58                             | 211   |
|      | 0             | 35            | 1                               | 183          | 0                              | 60                             | 221   |
|      | 0             | 62            | 38                              | 277          | 0                              | 51                             | 122   |
|      | 0             | 36            | 44                              | 249          | 0                              | 59                             | 157   |
|      | 0             | 48            | 34                              | 328          | 0                              | 72                             | 196   |
|      | 0             | 51            | 3                               | 247          | 0                              | 92                             | 105   |
|      | 0             | 54            | 47                              | 231          | 0                              | 41                             | 216   |
|      | 0             | 55            | 31                              | 278          | 0                              | 59                             | 198   |
|      | 0             | 56            | 35                              | 310          | 0                              | 26                             | 189   |
|      | 0             | 46            | 0                               | 283          | 0                              | 58                             | 213   |
|      | 0             | 61            | 20                              | 303          | 0                              | 57                             | 178   |
|      | 0             | 47            | 38                              | 322          | 0                              | 70                             | 164   |
|      | 0             | 54            | 24                              | 300          | 0                              | 55                             | 98    |
|      | 0             | 51            | 29                              | 311          | 0                              | 52                             |       |
|      |               | 64            |                                 |              |                                |                                |       |
|      |               | 64            |                                 |              |                                |                                |       |
| Mean | 0.0           | 52.6          | 23.5                            | 273.4        | 0.0                            | 57.0                           | 171.4 |
| SEM  | 0.0           | 2.1           | 4.3                             | 10.7         | 0.0                            | 3.8                            | 11.4  |

Data from Figure 5: worms reared at either 25C or 20C from L4 stage onward

|      | N2 (25C) | N2 (20C) | spe-47(zq27)(25C) | spe-50(ttTi4488)(25C) | spe-47(zq27);<br>spe-50(ttTi4488)(25C) | him-8(e1489)(25C) | spe-50(ttTi4488);<br>him-8(e1489)(25C) | spe-47(zq27);<br>him-8(e1489)(25C) |
|------|----------|----------|-------------------|-----------------------|----------------------------------------|-------------------|----------------------------------------|------------------------------------|
|      | 132      | 315      | 246               | 199                   | 98                                     | 157               | 169                                    | 155                                |
|      | 211      | 355      | 323               | 225                   | 124                                    | 156               | 121                                    | 199                                |
|      | 221      | 367      | 273               | 291                   | 121                                    | 136               | 162                                    | 187                                |
|      | 122      | 312      | 223               | 341                   | 97                                     | 148               | 139                                    | 179                                |
|      | 157      | 351      | 238               | 187                   | 150                                    | 14                | 125                                    | 229                                |
|      | 196      | 380      | 208               | 156                   | 94                                     | 177               | 148                                    | 223                                |
|      | 105      | 356      | 296               | 114                   | 116                                    | 162               | 168                                    | 240                                |
|      | 216      | 390      | 227               | 208                   | 119                                    | 136               | 139                                    | 169                                |
|      | 198      | 290      | 230               | 241                   | 102                                    | 129               | 67                                     | 165                                |
|      | 189      | 379      | 263               | 224                   | 156                                    | 132               | 71                                     | 189                                |
|      | 213      | 375      | 263               | 189                   | 126                                    | 133               | 109                                    | 200                                |
|      | 178      | 435      | 179               | 205                   | 103                                    | 195               | 138                                    | 215                                |
|      | 164      | 326      | 195               | 157                   | 103                                    | 128               | 133                                    | 210                                |
|      | 98       | 470      | 226               | 180                   | 117                                    | 107               | 91                                     | 205                                |
|      |          | 342      | 130               | 97                    | 123                                    | 167               |                                        | 135                                |
|      |          |          | 266               |                       |                                        | 128               |                                        |                                    |
|      |          |          | 222               |                       |                                        | 160               |                                        |                                    |
| Mean | 171.4    | 362.9    | 235.8             | 200.9                 | 116.6                                  | 139.1             | 127.1                                  | 193.3                              |
| SEM  | 11.4     | 12.0     | 10.9              | 16.0                  | 4.7                                    | 9.4               | 8.8                                    | 7.5                                |

Data from Figure 5 continued

|      | spe-47(hc198);<br>spe-50(ttTi4488);<br>him-8(1489)(25C) | spe-47(zq27);<br>spe-50(zq26);<br>him-8(e1489)(25C) | spe-47(zq27);<br>spe-50(ttTi4488);<br>him-8(e1489)(25C) | spe-47(zq27);<br>spe-50(ttTi4488);<br>him-8(e1489)(20C) | spe-47(zq27);<br>spe-50(ttTi4488);<br>him-8(e1489) X<br>him-8(e1489)<br>males(25C) | him-5(e1490)(25C) | spe-50(ttTi4488);<br>him-5(e1490)(25C) | spe-47(zq27);<br>him-5(e1490)(25C) | spe-47(zq27);<br>spe-50(ttTi4488);<br>him-5(e1489)(25C) |
|------|---------------------------------------------------------|-----------------------------------------------------|---------------------------------------------------------|---------------------------------------------------------|------------------------------------------------------------------------------------|-------------------|----------------------------------------|------------------------------------|---------------------------------------------------------|
|      | 16                                                      | 166                                                 | 12                                                      | 178                                                     | 311                                                                                | 34                | 88                                     | 141                                | 33                                                      |
|      | 16                                                      | 176                                                 | 0                                                       | 201                                                     | 435                                                                                | 110               | 48                                     | 123                                | 19                                                      |
|      | 21                                                      | 223                                                 | 0                                                       | 196                                                     | 220                                                                                | 158               | 96                                     | 118                                | 4                                                       |
|      | 21                                                      | 123                                                 | 14                                                      | 193                                                     | 373                                                                                | 103               | 82                                     | 133                                | 37                                                      |
|      | 5                                                       | 138                                                 | 19                                                      | 206                                                     | 356                                                                                | 148               | 65                                     | 115                                | 51                                                      |
|      | 3                                                       | 193                                                 | 19                                                      | 113                                                     | 341                                                                                | 31                | 78                                     | 147                                | 55                                                      |
|      | 10                                                      | 178                                                 | 10                                                      | 157                                                     | 194                                                                                | 122               | 55                                     | 131                                | 7                                                       |
|      | 19                                                      | 187                                                 | 15                                                      | 178                                                     | 80                                                                                 | 124               | 57                                     | 141                                | 102                                                     |
|      | 14                                                      | 175                                                 | 22                                                      | 177                                                     | 227                                                                                | 153               | 63                                     | 120                                | 102                                                     |
|      | 15                                                      | 199                                                 | 41                                                      | 104                                                     | 299                                                                                | 59                | 41                                     | 127                                | 91                                                      |
|      | 12                                                      | 224                                                 | 0                                                       | 188                                                     |                                                                                    | 9                 | 31                                     | 148                                | 69                                                      |
|      | 10                                                      | 110                                                 | 34                                                      | 162                                                     |                                                                                    | 46                | 61                                     | 135                                | 74                                                      |
|      | 23                                                      | 192                                                 |                                                         | 207                                                     |                                                                                    | 154               | 76                                     | 16                                 | 110                                                     |
|      | 17                                                      | 162                                                 |                                                         | 210                                                     |                                                                                    | 94                | 66                                     |                                    | 105                                                     |
|      | 7                                                       | 209                                                 |                                                         | 141                                                     |                                                                                    | 150               |                                        |                                    |                                                         |
|      |                                                         | 190                                                 |                                                         |                                                         |                                                                                    |                   |                                        |                                    |                                                         |
| Mean | 13.9                                                    | 177.8                                               | 15.5                                                    | 174.1                                                   | 283.6                                                                              | 99.7              | 64.8                                   | 122.7                              | 61.4                                                    |
| SEM  | 1.6                                                     | 8.1                                                 | 3.7                                                     | 8.6                                                     | 32.9                                                                               | 13.3              | 4.8                                    | 9.4                                | 10.0                                                    |

Data from complementation tests. The data reported here are fertility of the F1 offspring reared at 25C from the cross of the strain harboring ttTi4488 with the test gene (spe-7 or spe-18).

|      | spe-7(mn252) | spe-18(hc133) |
|------|--------------|---------------|
|      | 197          | 174           |
|      | 225          | 223           |
|      | 193          | 178           |
|      | 246          | 155           |
|      | 241          | 186           |
|      | 222          | 204           |
|      | 115          | 190           |
|      | 187          | 225           |
|      | 228          | 227           |
|      | 125          | 195           |
|      |              | 207           |
|      |              | 116           |
| mean | 197.9        | 190.0         |
| SEM  | 14.4         | 9.3           |
